# Supplementary material for: Long non-coding RNA LPP-AS2 promotes glioma tumorigenesis via miR-7-5p/EGFR/PI3K/AKT/c-MYC feedback loop
Source: PubMed Central journal article supplement (PMC7510091; doi:10.1186/s13046-020-01695-8), 2020-09-22

# Supplementary figure 1

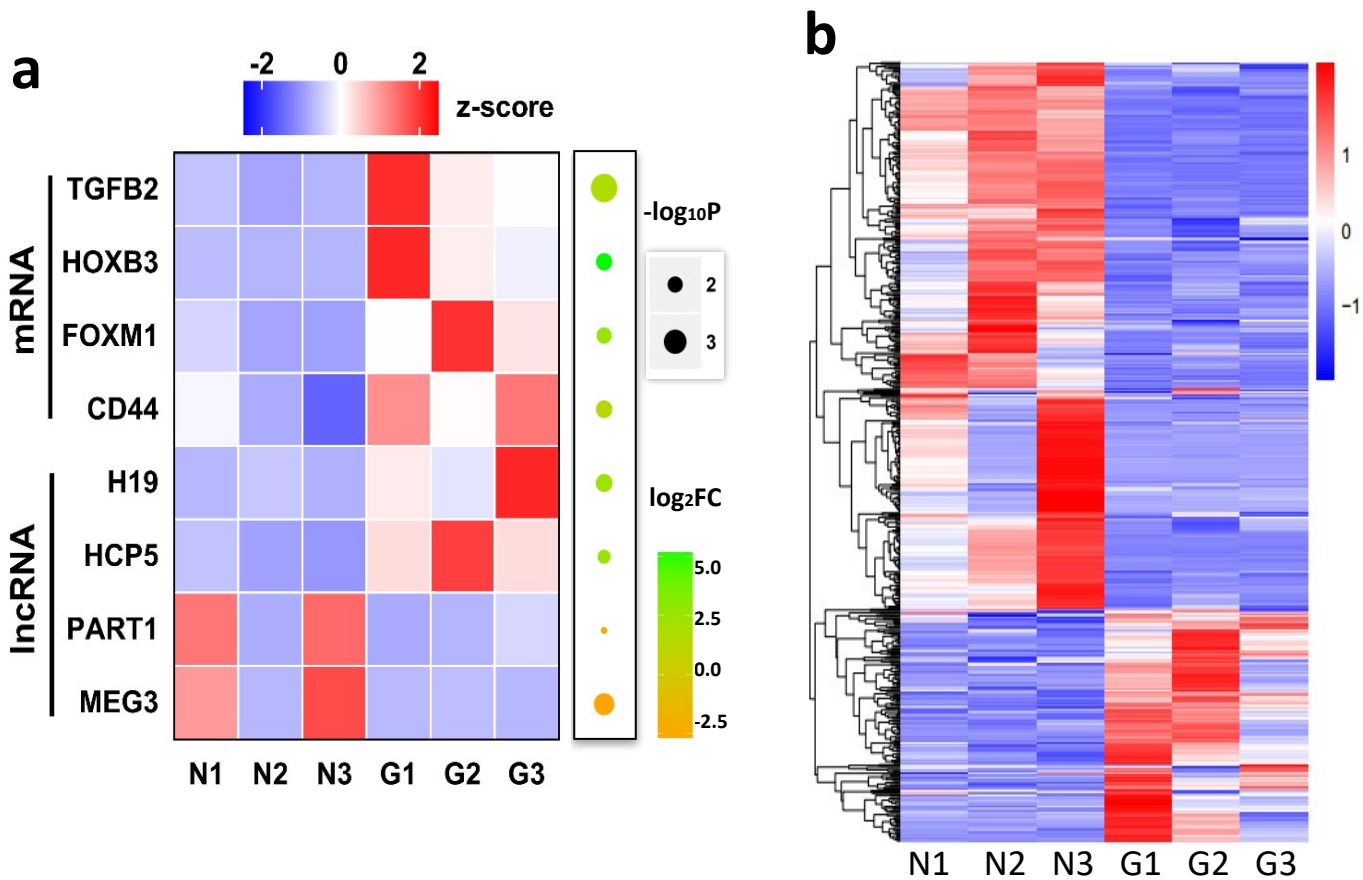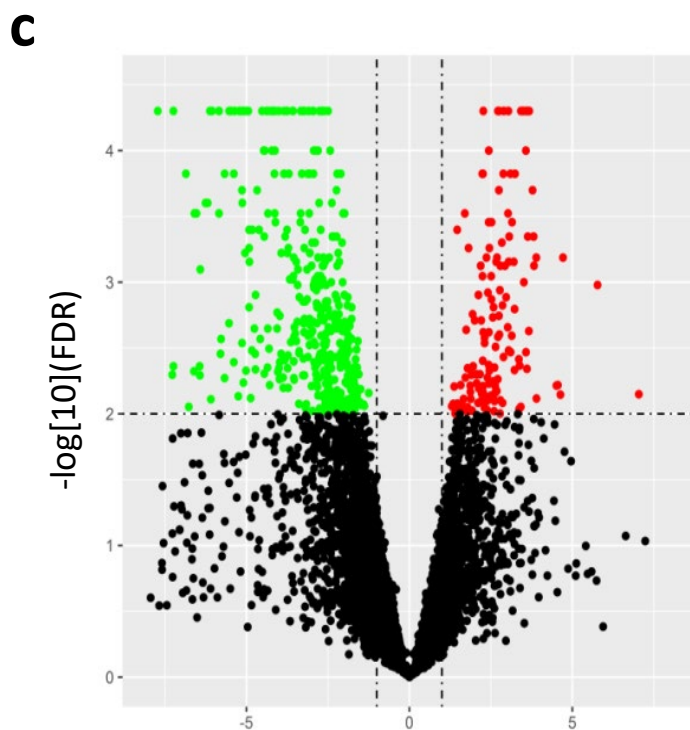

# Supplementary figure 2

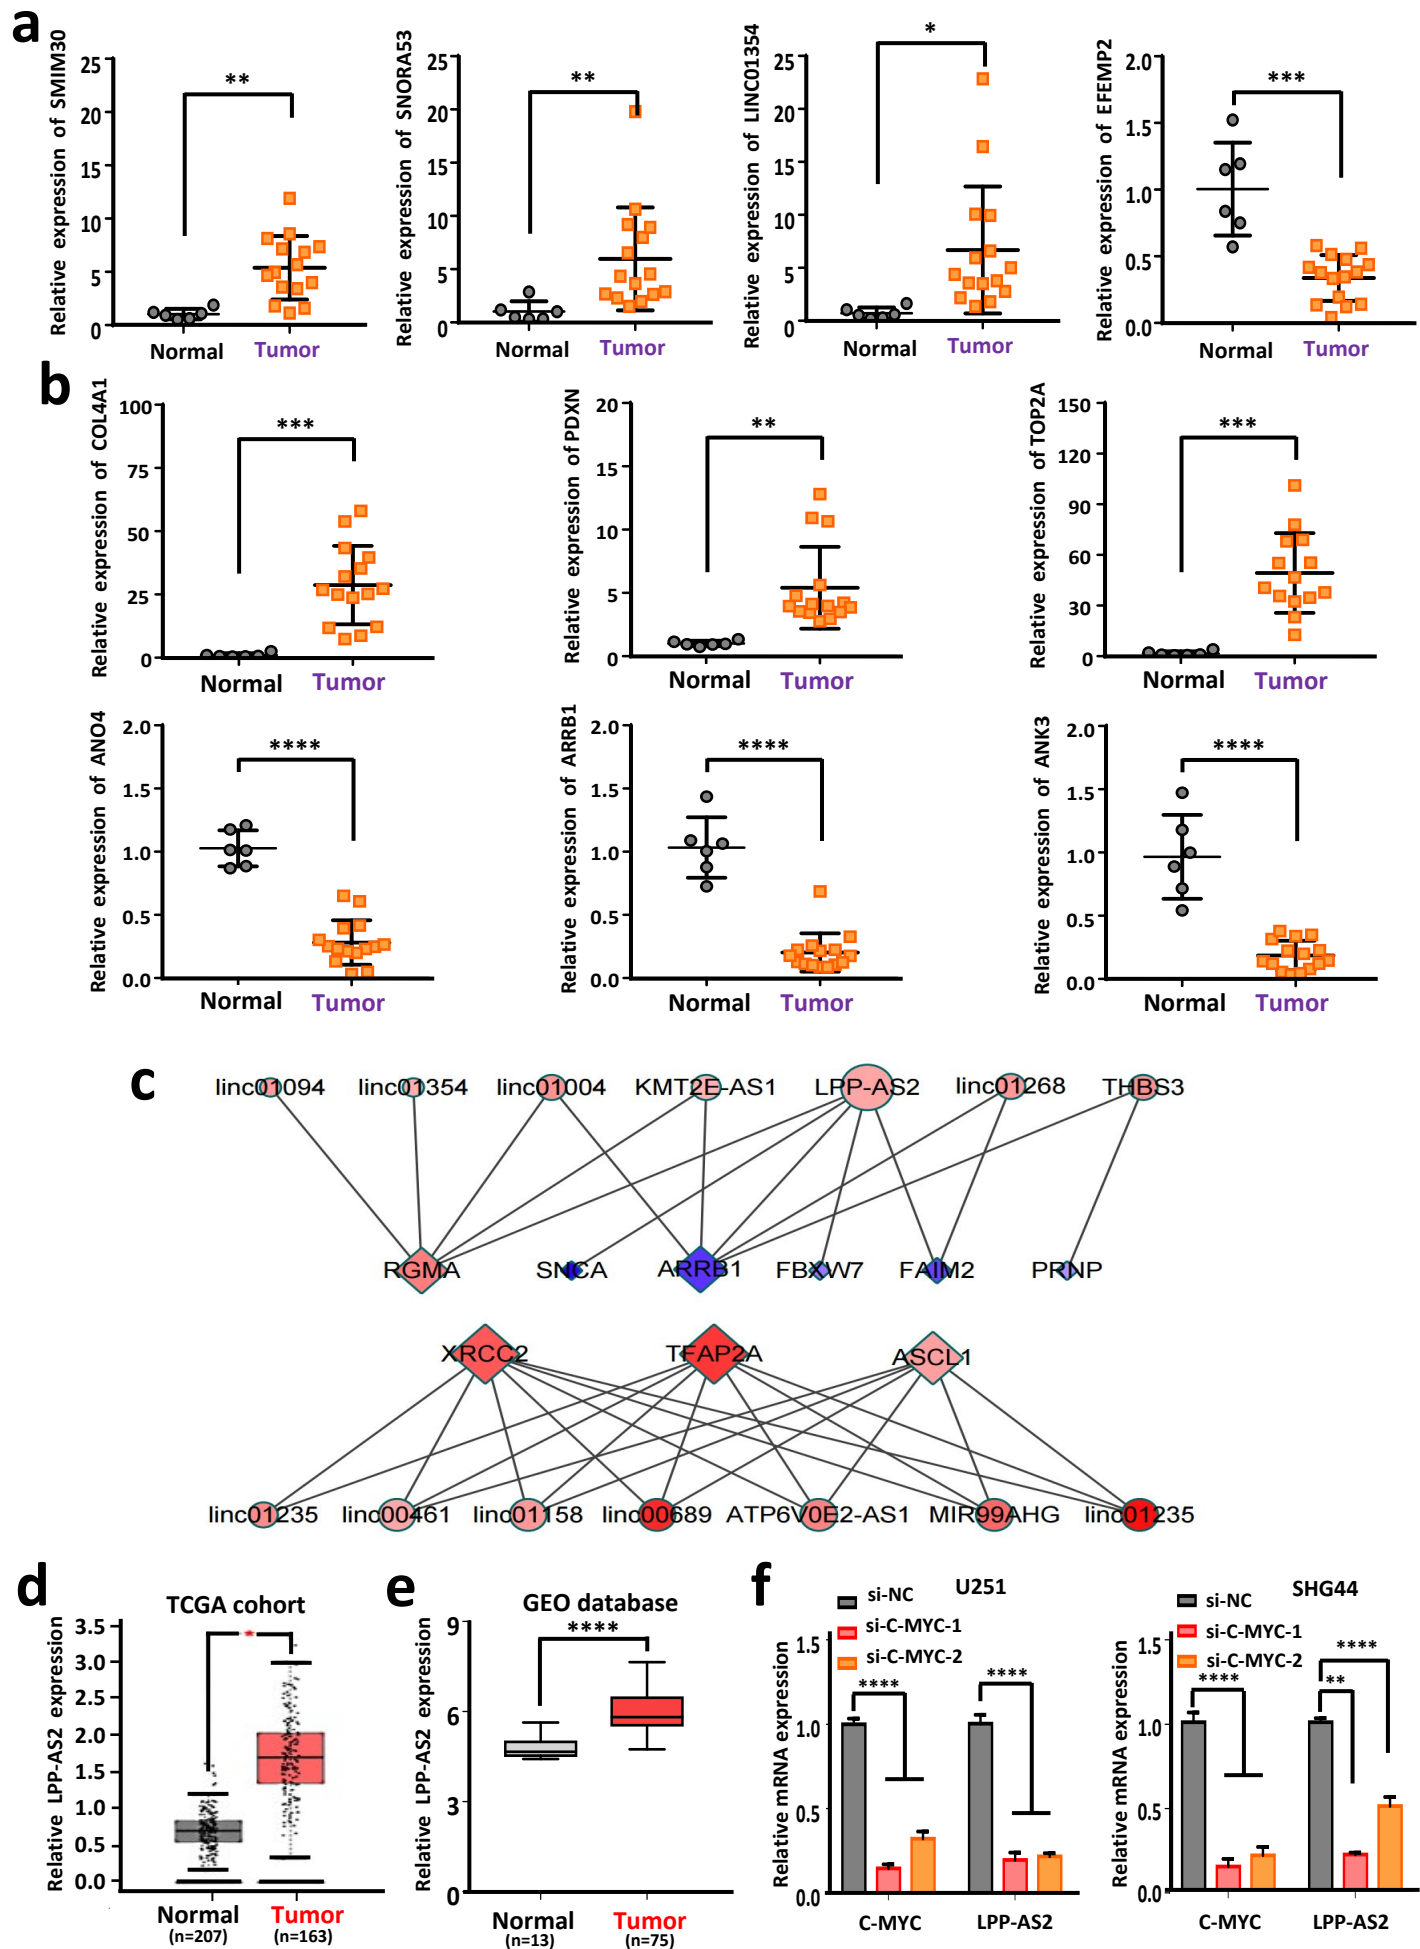

# Supplementary figure 3

**a**

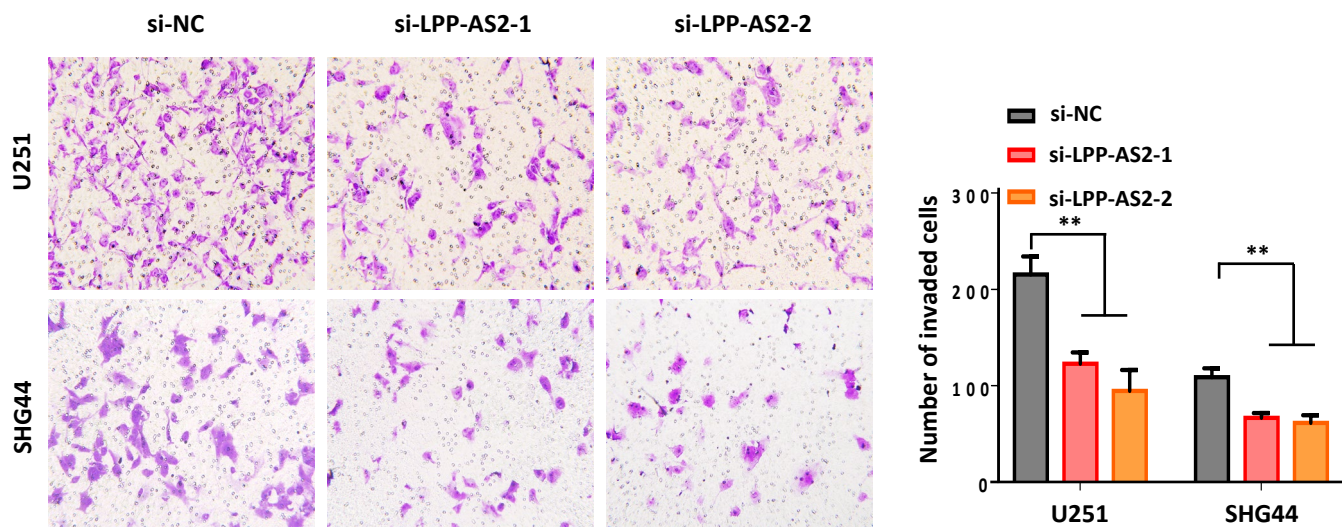

**b**

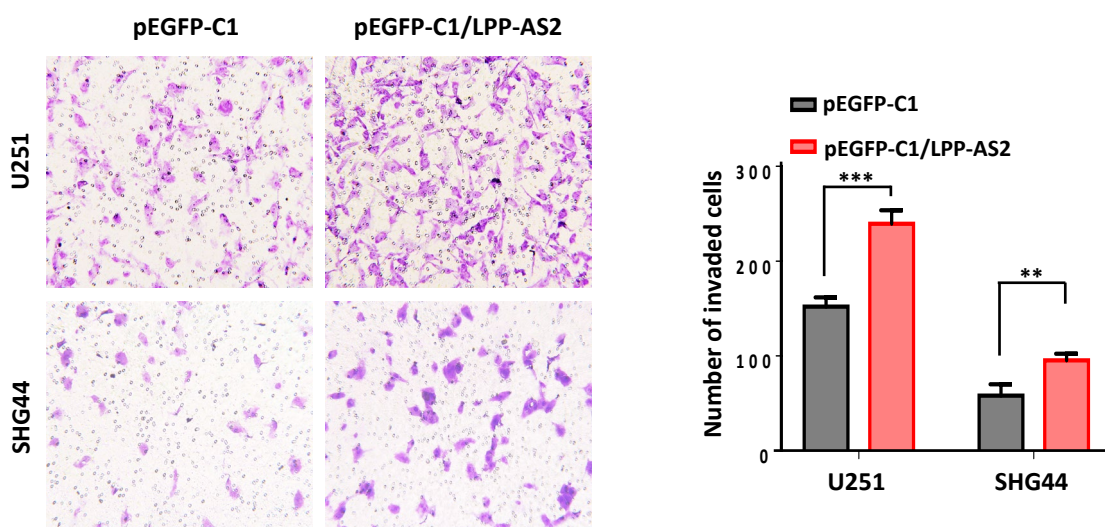

**c**

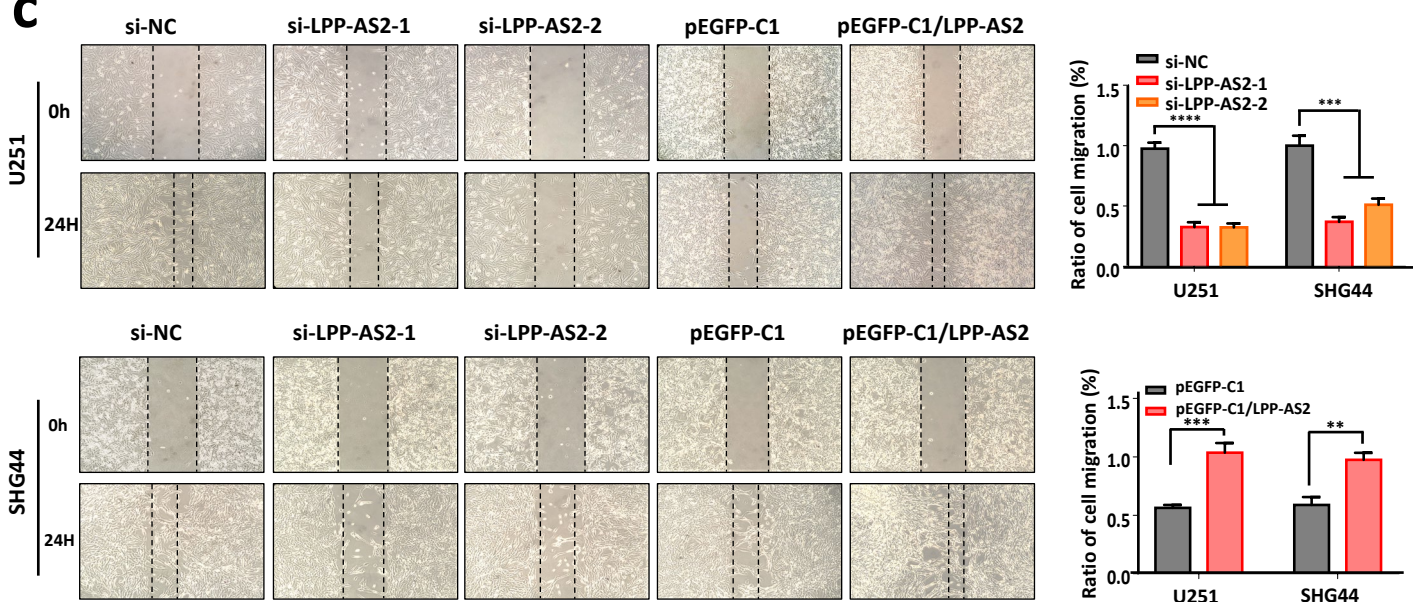

# Supplementary figure 4

**a**

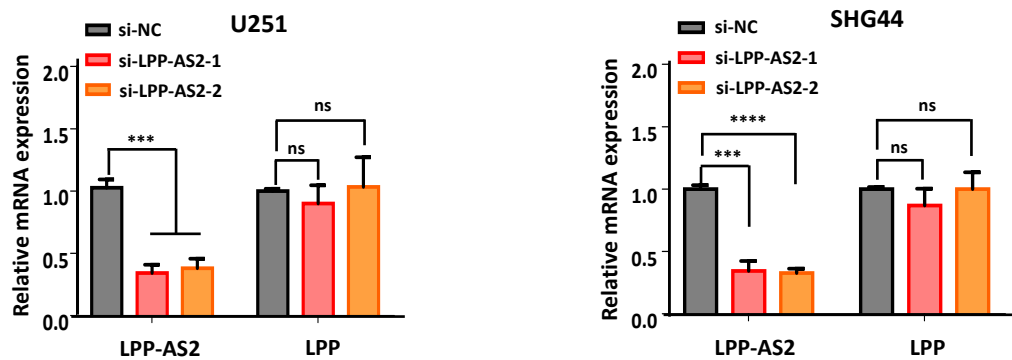

**b**

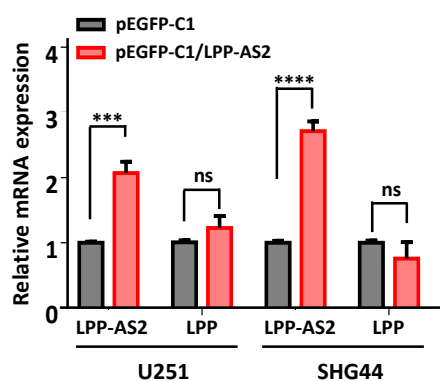

**c**

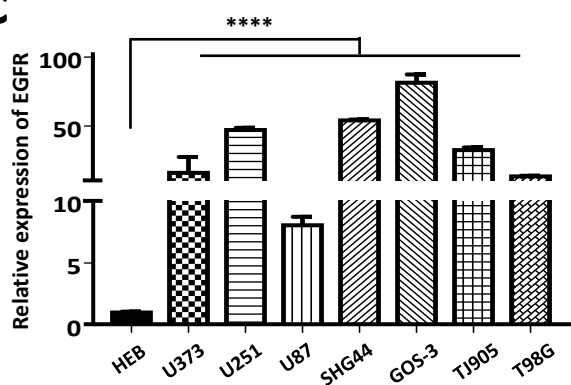

**d**

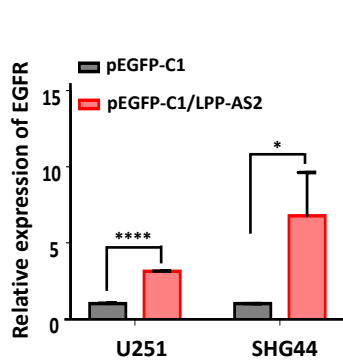

**e**

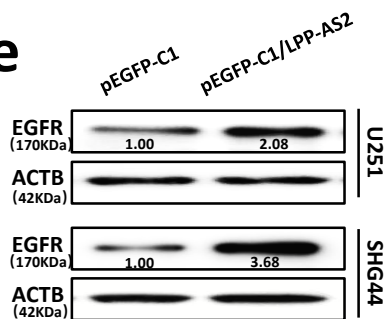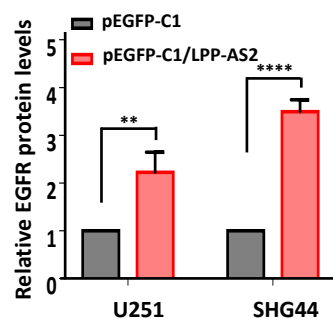



# Supplementary figure 5

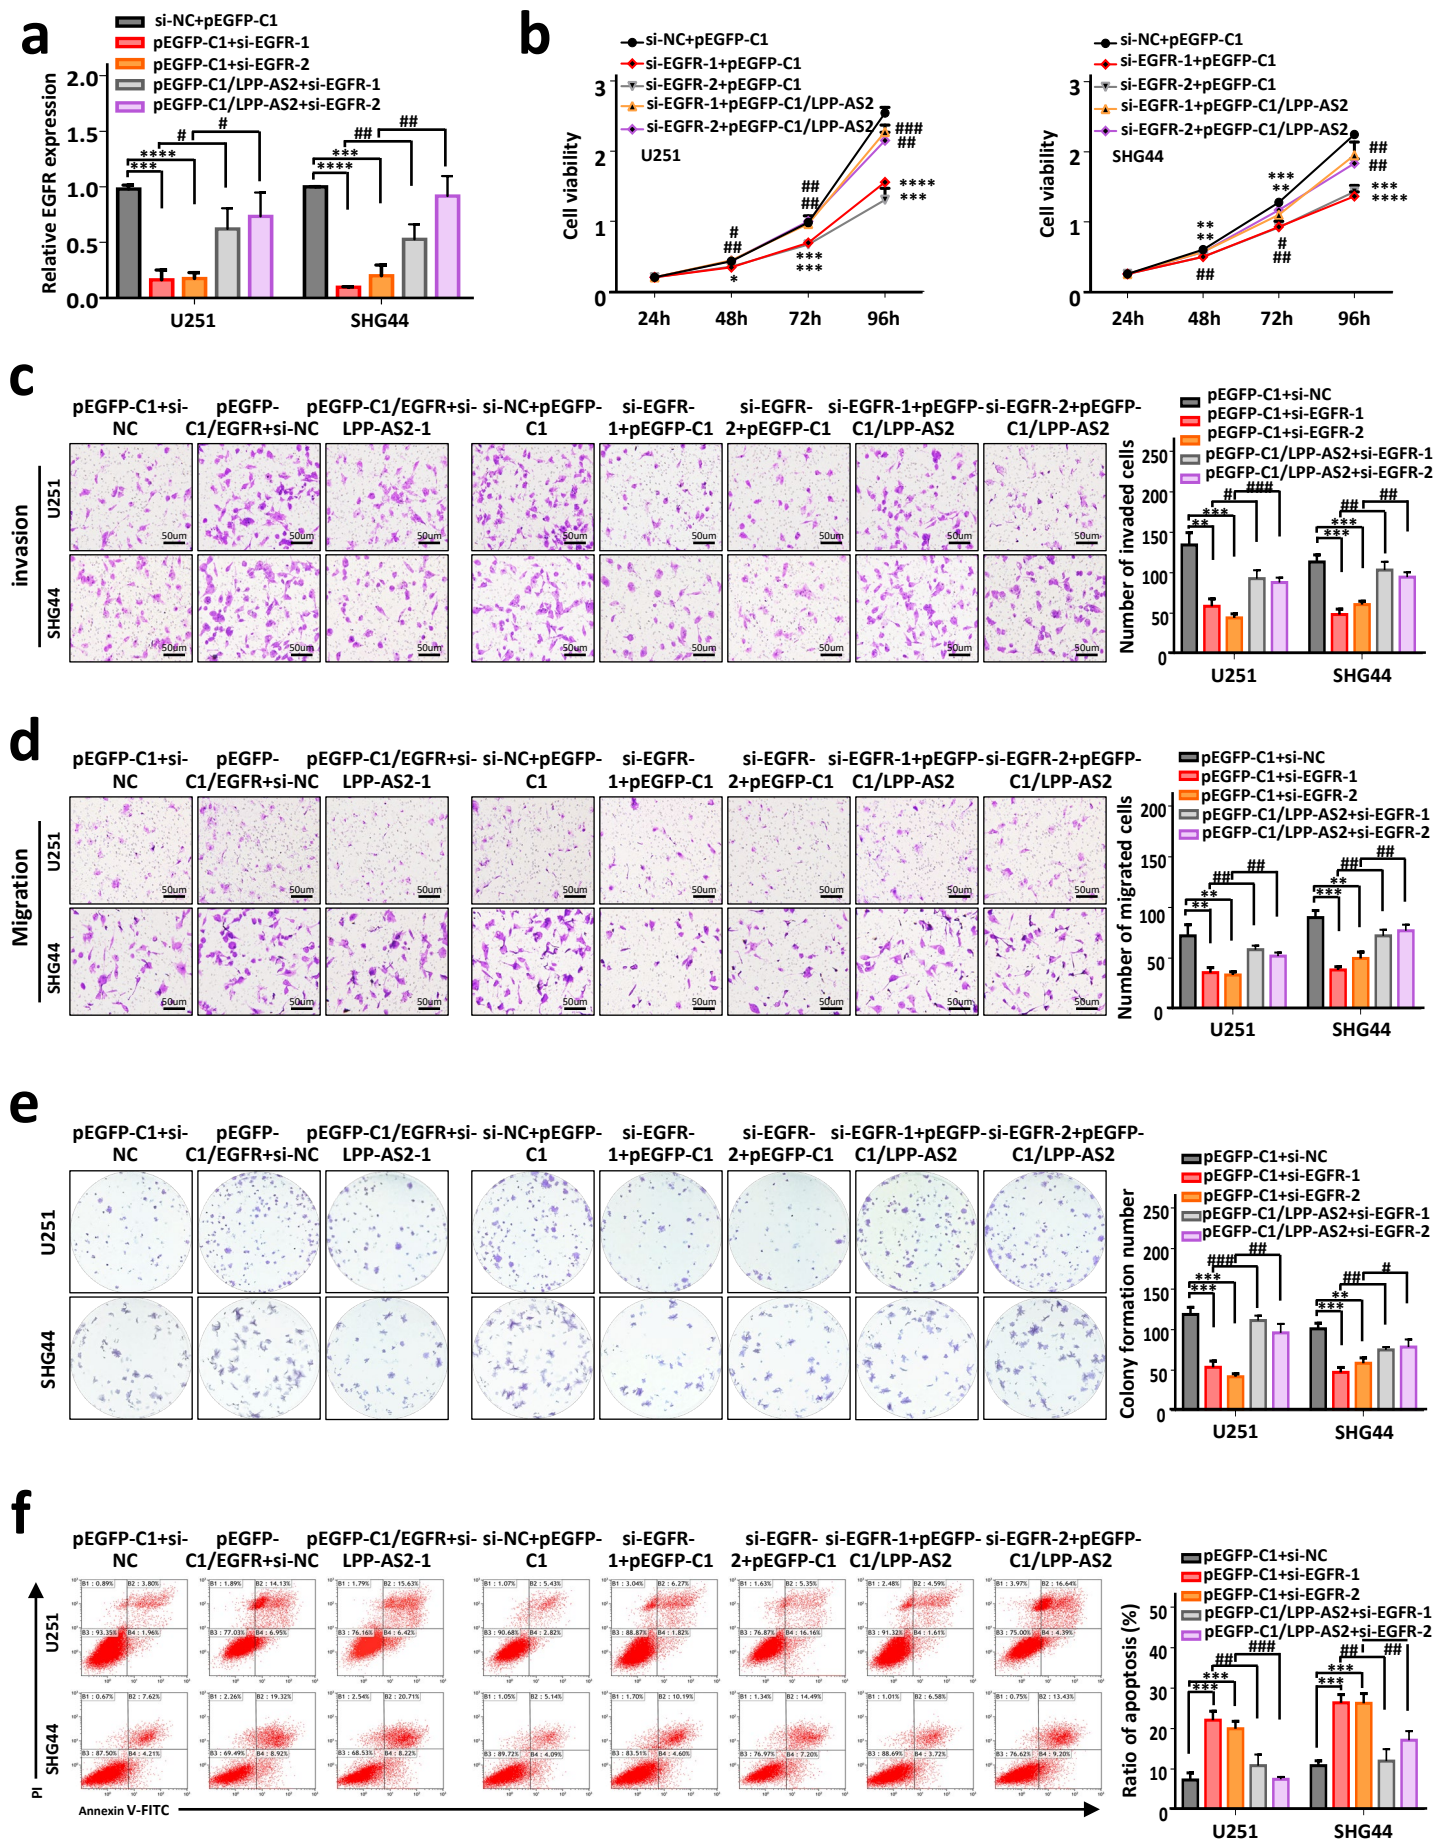

# Supplementary figure 6

**a**

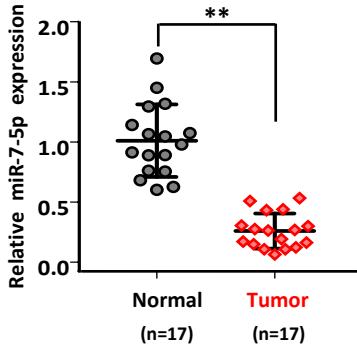

**b**

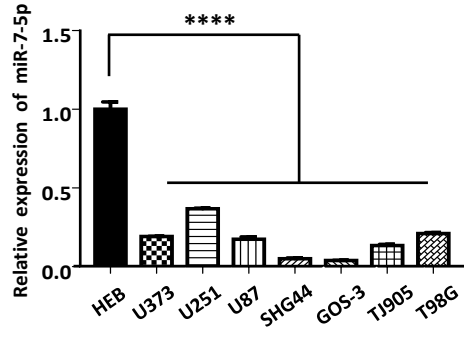

**c**

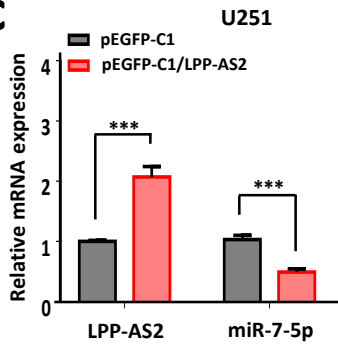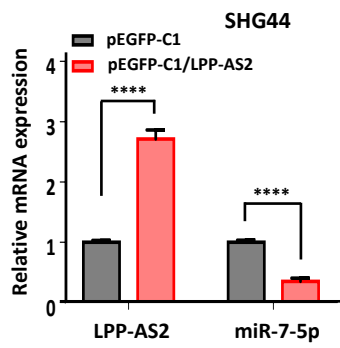

**d**

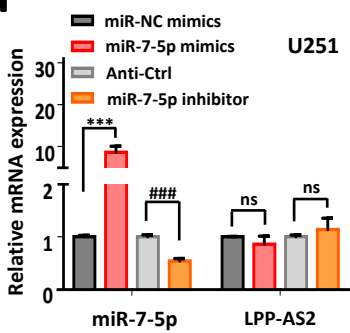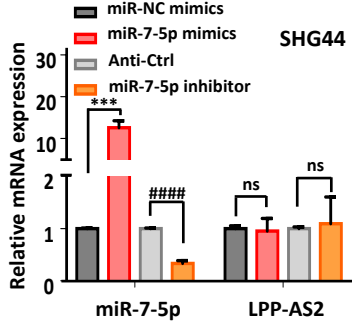

**e**

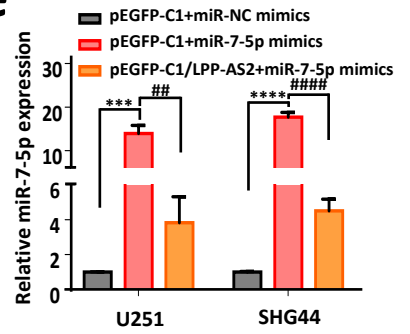

# Supplementary figure 7

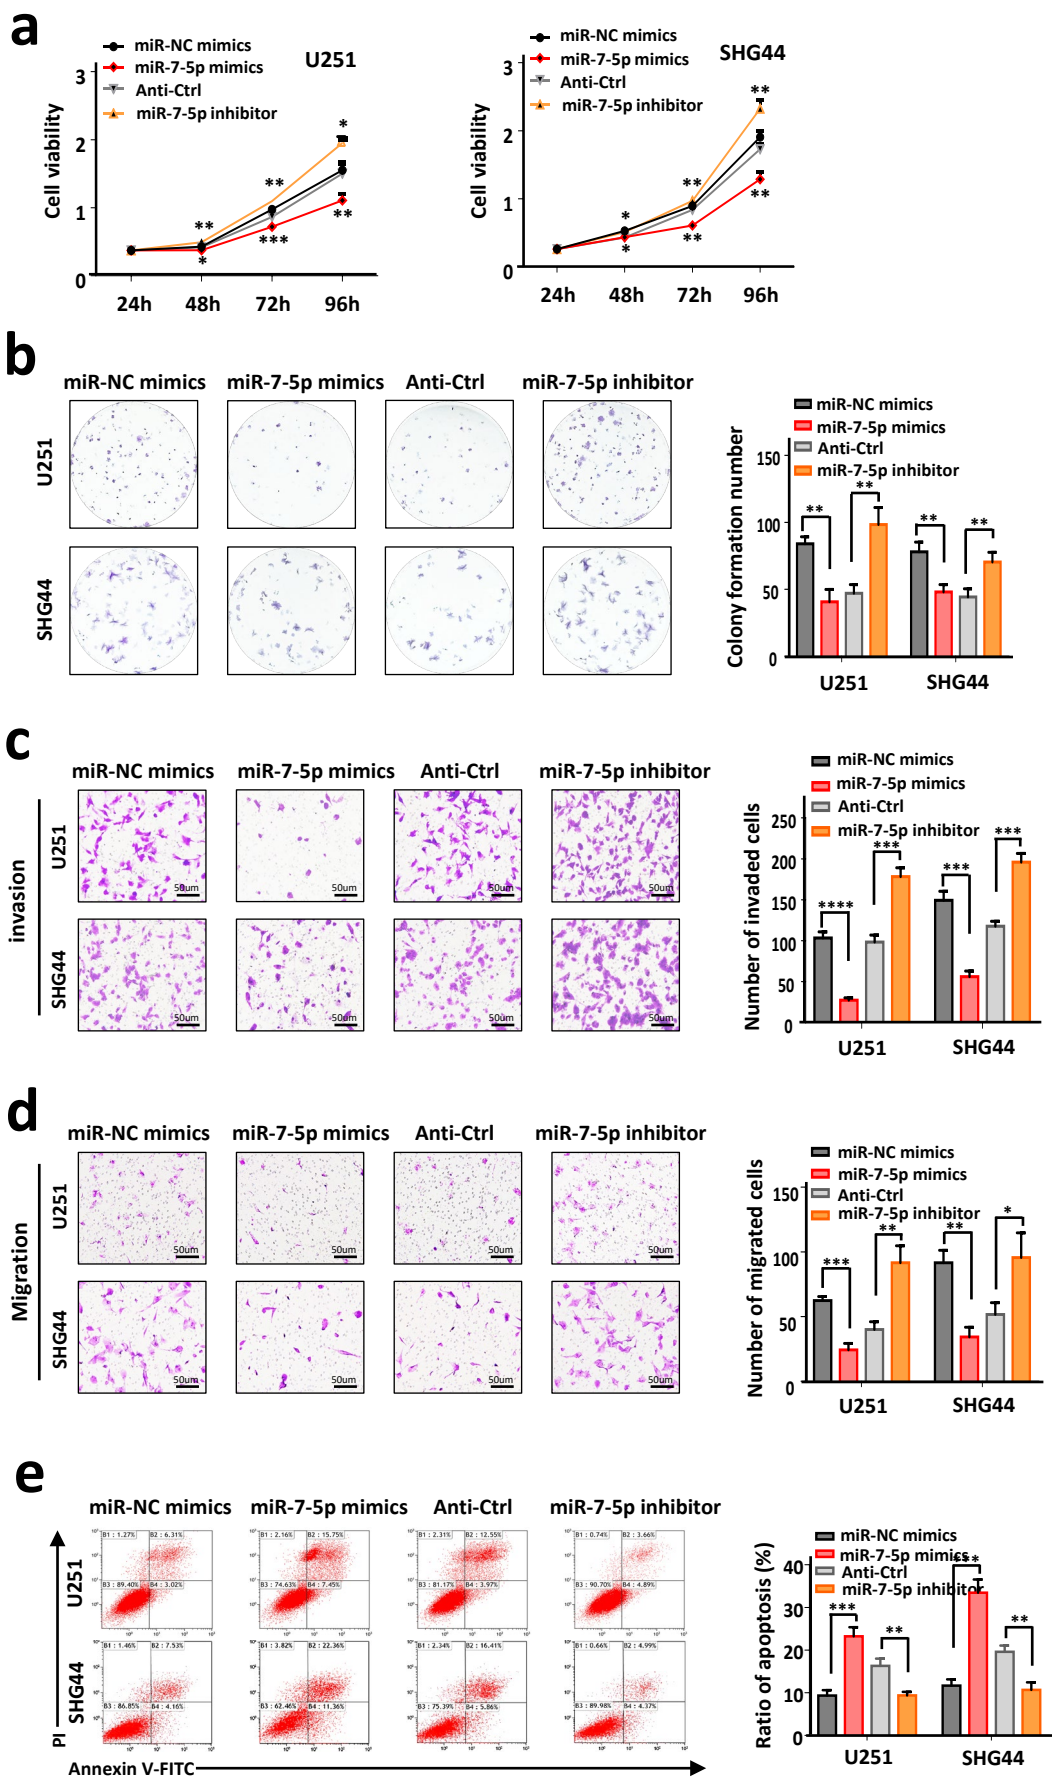



# Supplementary figure 8

**a**

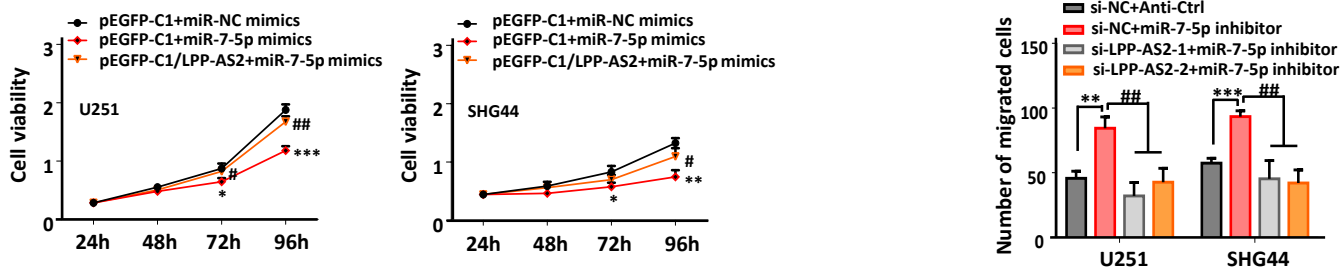

**b**

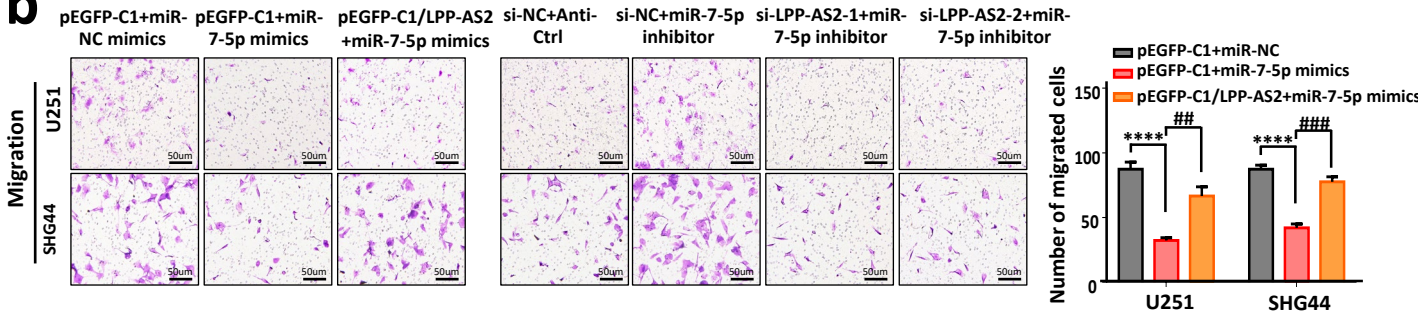

**c**

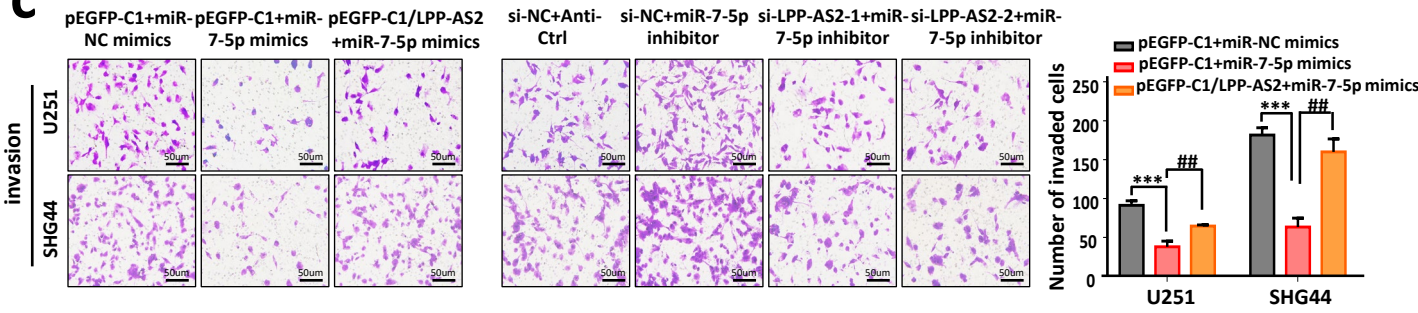

**d**

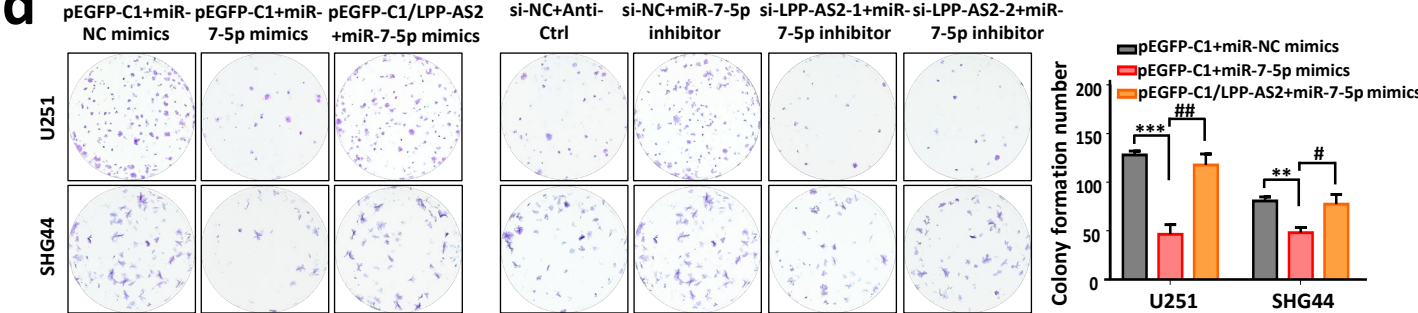

**e**

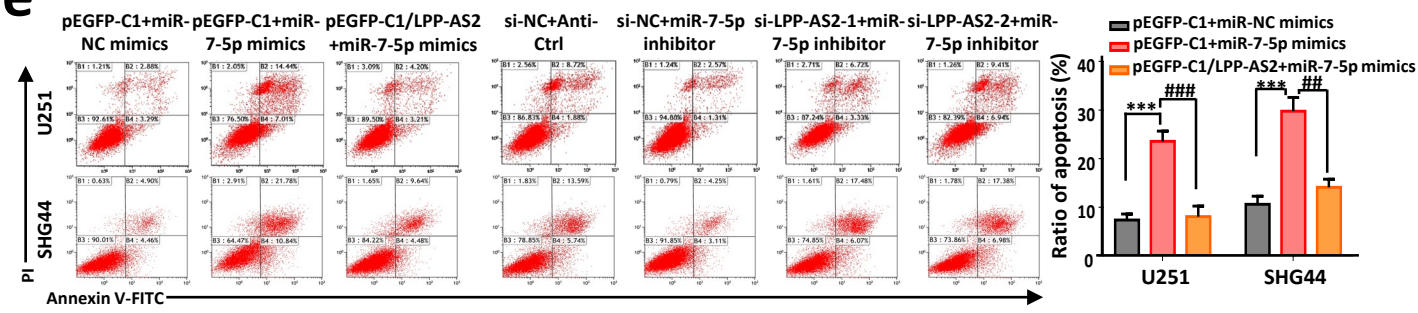



# Supplementary figure 9

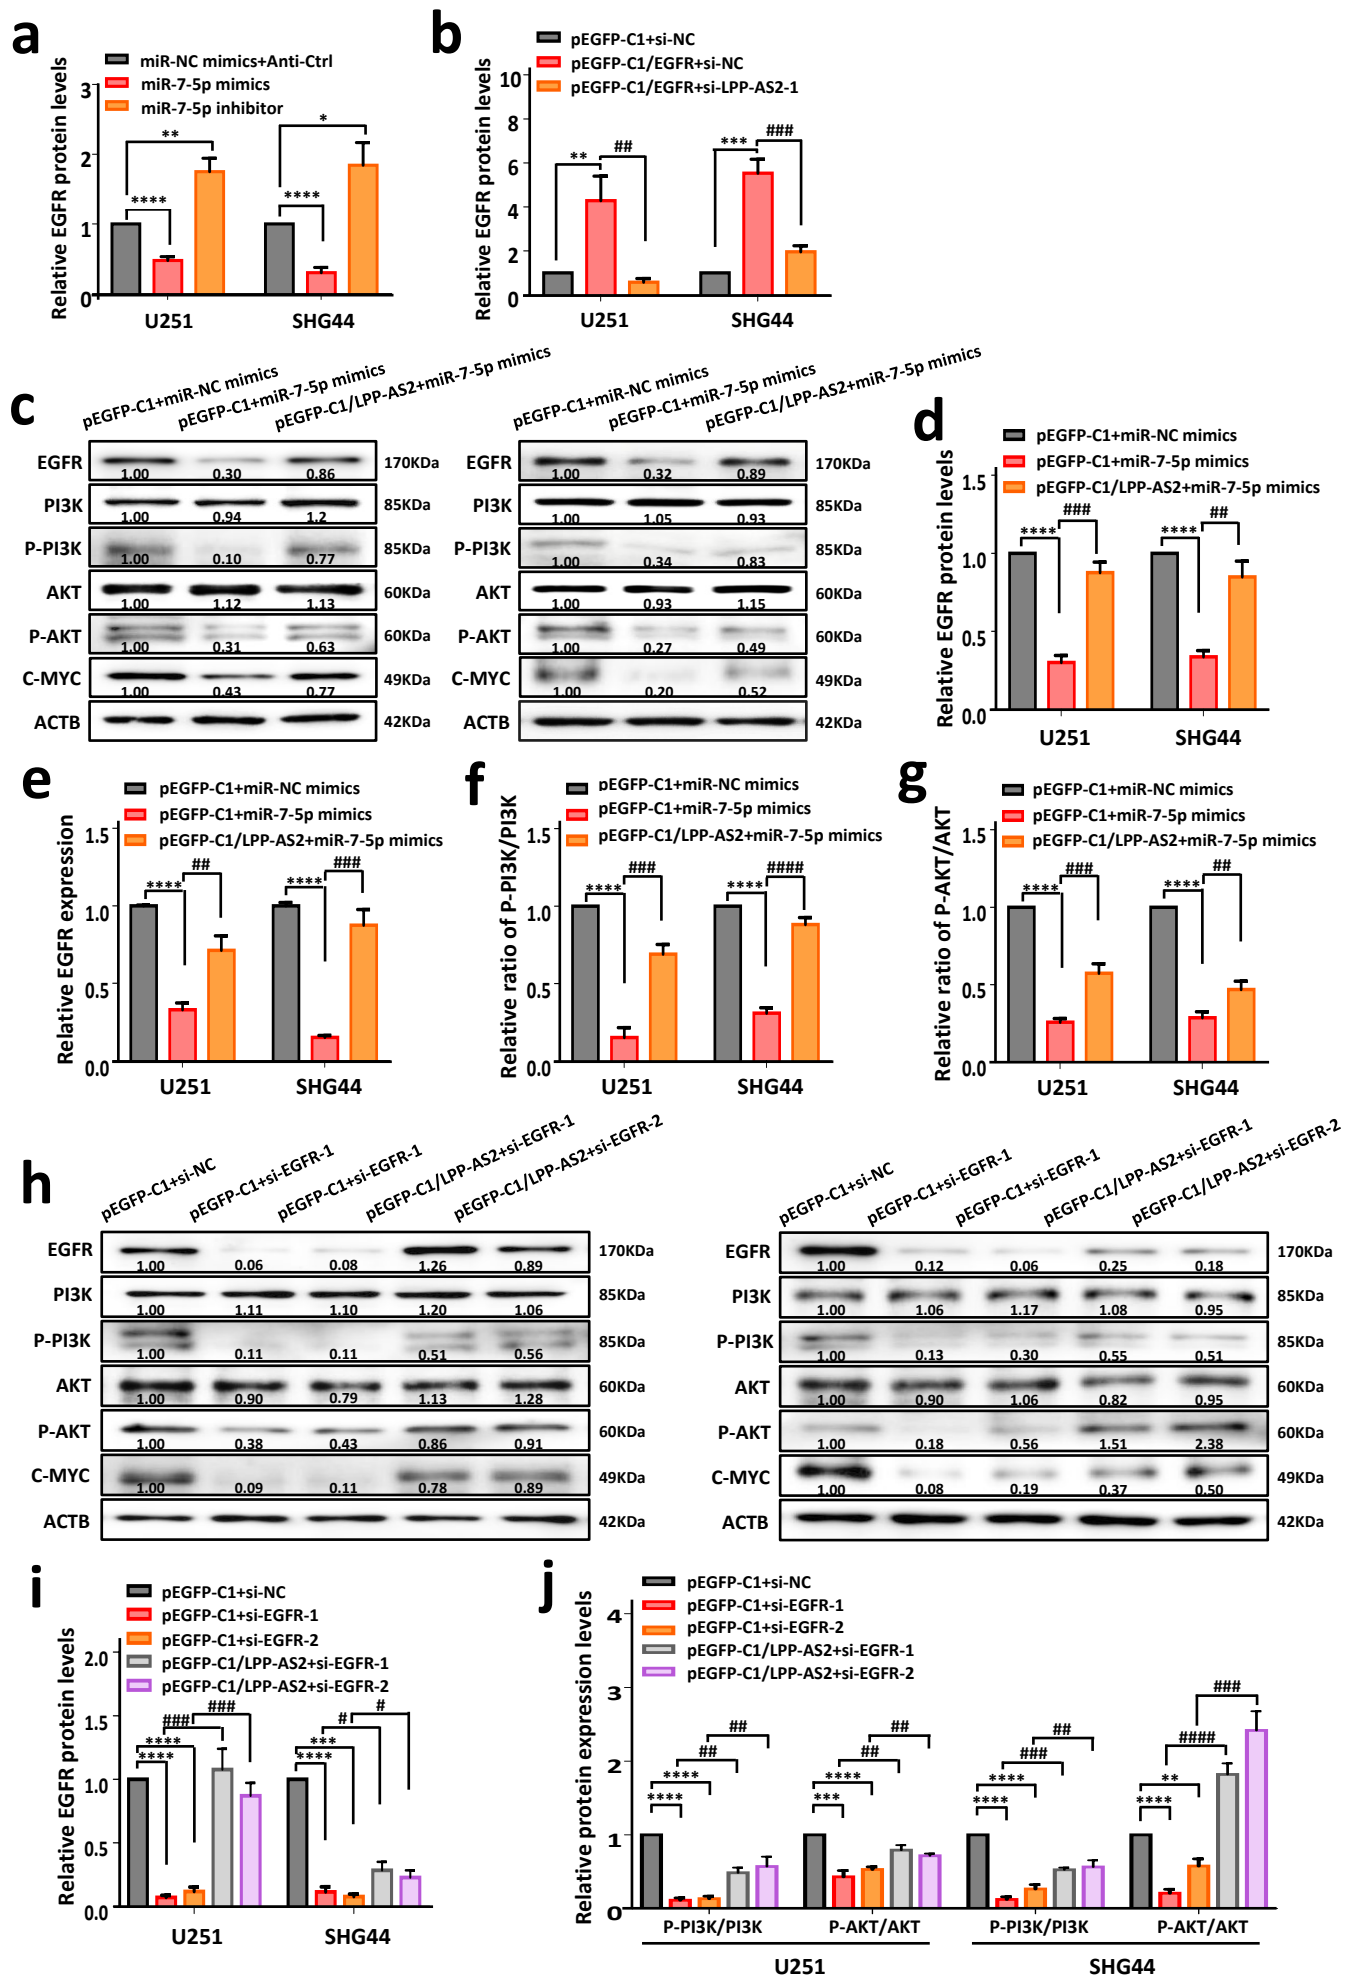

Supplement: 13046_2020_1695_MOESM1_ESM.pdf [file 13046_2020_1695_MOESM1_ESM.pdf]
